# Supplementary material
Source: PubMed Central journal article supplement (PMC6322870)
Supplement: supp_RA118.005866_140790_1_supp_230144_ph49g4.pdf [file supp_RA118.005866_140790_1_supp_230144_ph49g4.pdf]

## SUPPORTING INFORMATION

Prostaglandin E<sub>2</sub> down-regulates sirtuin 1 (SIRT1) leading to elevated levels of aromatase, providing insights into the obesity-breast cancer connection\*

Kotha Subbaramaiah<sup>1</sup>, Neil M. Iyengar<sup>2</sup>, Monica Morrow<sup>3</sup>, Olivier Elemento<sup>4</sup>, Xi Kathy Zhou<sup>5</sup> and Andrew J. Dannenberg<sup>1</sup>

From the Departments of <sup>1</sup>Medicine, <sup>4</sup>Physiology and Biophysics, <sup>5</sup>Healthcare Policy & Research, Weill Cornell Medical College, New York, NY 10065, and the Departments of <sup>2</sup>Medicine and <sup>3</sup>Surgery, Memorial Sloan Kettering Cancer Center, New York, NY 10065

### LEGEND TO SUPPORTING FIGURE

**Figure S1. PGE<sub>2</sub> acts via EP<sub>2</sub> and EP<sub>4</sub> to induce ATF3 in human breast ASCs.** In A-C, primary human breast ASCs were used. A, cells were treated with indicated concentrations of PGE<sub>2</sub> for 2h. B, cells were treated with indicated concentrations of butaprost, an EP<sub>2</sub> agonist or CAY10684, an EP<sub>4</sub> agonist (C) for 2h. Cell lysates were subjected to western blotting as indicated.

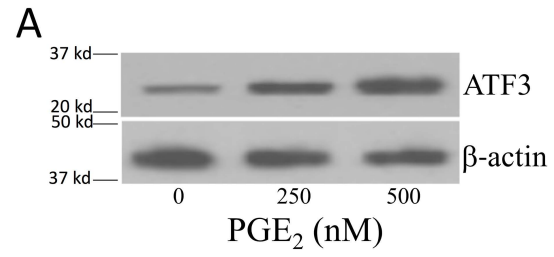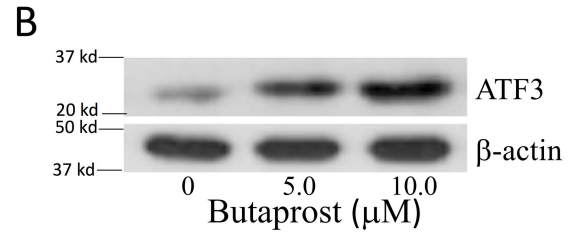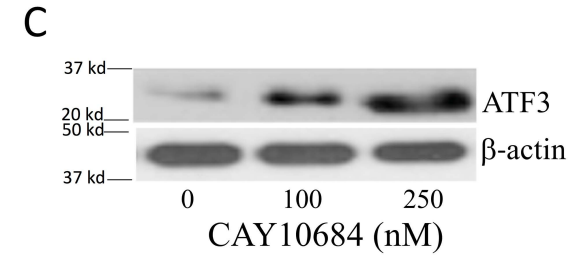

SUPPORTING FIGURE 1
